# Supplementary material
Source: MDPI journal article supplement (https://www.mdpi.com/2073-4441/14/24/4010)
Supplement: s1 [file s1]

**Table S3.** Summary data on available raw records of *Acipenserobdella volgensis* (Zykoff, 1904) (Hirudinea: Piscicolidae) per host \*

| Host family   | Host species                     | Host abbreviation | Suitable primary host (successful feeding) | Unconfirmed primary host (feeding unsuccessful or not observed) | Shelter host |
|---------------|----------------------------------|-------------------|--------------------------------------------|-----------------------------------------------------------------|--------------|
| Unionidae     | <i>Anodonta anatina</i>          | AnoAna            | 0                                          | 0                                                               | 2            |
| Acipenseridae | <i>Acipenser baerii</i>          | AciBae            | 2                                          | 0                                                               | 0            |
| Acipenseridae | <i>Acipenser gueldenstaedtii</i> | AciGue            | 1                                          | 0                                                               | 0            |
| Acipenseridae | <i>Acipenser nudiiventris</i>    | AciNud            | 0                                          | 1                                                               | 0            |
| Acipenseridae | <i>Acipenser ruthenus</i>        | AciRut            | 3                                          | 0                                                               | 0            |
| Acipenseridae | <i>Acipenser stellatus</i>       | AciSte            | 2                                          | 1                                                               | 0            |
| Acipenseridae | <i>Acipenser sturio</i>          | AciStu            | 2                                          | 2                                                               | 0            |
| Acipenseridae | <i>Huso huso</i>                 | HusHus            | 1                                          | 1                                                               | 0            |
| Cyprinidae    | <i>Abramis brama</i>             | AbrBra            | 1                                          | 4                                                               | 0            |
| Cyprinidae    | <i>Blicca bjoerkna</i>           | BliBjo            | 0                                          | 1                                                               | 0            |
| Cyprinidae    | <i>Leuciscus leuciscus</i>       | LeuLeu            | 1                                          | 0                                                               | 0            |
| Salmonidae    | <i>Coregonus migratorius</i>     | CorMig            | 0                                          | 1                                                               | 0            |
| Salmonidae    | <i>Salmo trutta</i>              | SalTru            | 1                                          | 0                                                               | 0            |
| Esocidae      | <i>Esox lucius</i>               | EsoLuc            | 0                                          | 1                                                               | 0            |

\*See Table S2 for data on the raw host records.
