# Supplementary material
Source: MDPI journal article supplement (https://www.mdpi.com/2073-4441/14/24/4010)
Supplement: s1 [file s1]

**Table S2.** Georeferenced occurrences and host records of *Acipenserobdella volgensis* (Zykoff, 1904) (Hirudinea: Piscicolidae)

| Country | Region          | Locality                                                                                                                       | Latitude (N) | Longitude (E) | Hosts                                                                       | Feeding                                           | N, leeches | References                 |
|---------|-----------------|--------------------------------------------------------------------------------------------------------------------------------|--------------|---------------|-----------------------------------------------------------------------------|---------------------------------------------------|------------|----------------------------|
| Russia  | European Russia | Moscow River, Volga River basin, Moscow Region, 12 June 2018, V. Maryinsky leg.                                                | 55.7038      | 36.7288       | <i>Anodonta anatina</i> (Linnaeus, 1758) (Unionidae)                        | Not observed (shelter host)                       | 2          | This study                 |
| Russia  | European Russia | Moscow River, Volga River basin, Moscow Region, 30 June 2019, V. Maryinsky leg.                                                | 55.7038      | 36.7288       | <i>Anodonta anatina</i> (Linnaeus, 1758) (Unionidae)                        | Not observed (shelter host)                       | 1          | This study                 |
| Russia  | European Russia | Moscow River, Volga River basin, Moscow Region, 21 June 2021, D. Palatov leg.                                                  | 55.6245      | 36.4033       | <i>Leuciscus leuciscus</i> (Linnaeus, 1758) (Cyprinidae)                    | Successful (uncovered by crop content sequencing) | 5          | This study                 |
| Russia  | European Russia | Oka River, Volga River basin, Kaluga Region, 12 June 2015, D. Palatov leg.                                                     | 54.5078      | 36.1084       | <i>Acipenser ruthenus</i> Linnaeus, 1758 (Acipenseridae)                    | Successful                                        | N/A        | This study                 |
| Russia  | European Russia | Oka River, Volga River basin, Kaluga Region, 12 June 2015, D. Palatov leg.                                                     | 54.5078      | 36.1084       | <i>Blicca bjoerkna</i> (Linnaeus, 1758) (Cyprinidae)                        | N/A                                               | N/A        | This study                 |
| Russia  | European Russia | Oka River, Volga River basin, Orel Region, 09 June 2015, D. Palatov leg.                                                       | 53.5452      | 36.2289       | <i>Acipenser ruthenus</i> Linnaeus, 1758 (Acipenseridae)                    | Successful                                        | 2          | This study                 |
| Russia  | European Russia | Volga River near Saratov (the type locality), 27 July 1900 (Julian calendar date; actual date: 08 August 1900), V. Zykoff leg. | 51.5         | 46.0          | <i>Acipenser nudiventris</i> Lovetsky, 1828 (Acipenseridae) (the type host) | N/A                                               | 1          | Zykoff [1]                 |
| Russia  | European Russia | Volga River near Saratov                                                                                                       | 51.5         | 46.0          | <i>Acipenser sturio</i> Linnaeus, 1758 (Acipenseridae)                      | N/A                                               | 2          | Plotnikov [2]              |
| Russia  | European Russia | Oka River near Murom, Volga River basin, 1920-1921, V. Zhadin leg.                                                             | 55.58        | 42.07         | N/A                                                                         | N/A                                               | 1          | Stschegolew [3]            |
| Russia  | European Russia | Volga River at Volsk city                                                                                                      | 52.0370      | 47.3995       | <i>Acipenser stellatus</i> Pallas, 1771 (Acipenseridae)                     | Successful                                        | N/A        | Bogdanova & Nikolskaya [4] |
| Russia  | European Russia | Volga River at Volsk city                                                                                                      | 52.0370      | 47.3995       | <i>Acipenser sturio</i> Linnaeus, 1758 (Acipenseridae)                      | Successful                                        | N/A        | Bogdanova & Nikolskaya [4] |
| Russia  | European        | Volga River at                                                                                                                 | 46.2328      | 48.4986       | <i>Acipenser stellatus</i>                                                  | Successful                                        | N/A        | Bogdanova &                |

| Country | Region          | Locality                                                                                                            | Latitude (N) | Longitude (E) | Hosts                                                    | Feeding    | N, leeches | References                 |
|---------|-----------------|---------------------------------------------------------------------------------------------------------------------|--------------|---------------|----------------------------------------------------------|------------|------------|----------------------------|
|         | Russia          | Tumak village                                                                                                       |              |               | Pallas, 1771 (Acipenseridae)                             |            |            | Nikolskaya [4]             |
| Russia  | European Russia | Volga River at Tumak village                                                                                        | 46.2328      | 48.4986       | <i>Acipenser sturio</i> Linnaeus, 1758 (Acipenseridae)   | Successful | N/A        | Bogdanova & Nikolskaya [4] |
| Russia  | European Russia | Torovo, Rybinsk Reservoir on Volga River, summer of 1992, I. Tomilina leg.                                          | 59.1303      | 37.7114       | <i>Abramis brama</i> (Linnaeus, 1758) (Cyprinidae)       | Successful | 10         | Lapkina et al. [5]         |
| Russia  | European Russia | Gorky Reservoir on Volga River, September 1997, A. Tzvetkov leg. (exact locality is not given; approx. coordinates) | 57.0         | 43.2          | <i>Abramis brama</i> (Linnaeus, 1758) (Cyprinidae)       | N/A        | 1          | Lapkina et al. [5]         |
| Russia  | European Russia | Kuybyshev Reservoir on Volga River, 1987, L. Lapkina leg. (exact locality is not given; approx. coordinates)        | 53.8         | 49.0          | <i>Abramis brama</i> (Linnaeus, 1758) (Cyprinidae)       | N/A        | 1          | Lapkina et al. [5]         |
| Russia  | European Russia | Volgograd Reservoir on Volga River, 1987, L. Lapkina leg. (exact locality is not given; approx. coordinates)        | 49.13        | 44.94         | <i>Abramis brama</i> (Linnaeus, 1758) (Cyprinidae)       | N/A        | 4          | Lapkina et al. [5]         |
| Russia  | European Russia | Volgograd Reservoir on Volga River, 1987, L. Lapkina leg. (exact locality is not given; approx. coordinates)        | 49.13        | 44.94         | <i>Acipenser ruthenus</i> Linnaeus, 1758 (Acipenseridae) | Successful | 1          | Lapkina et al. [5]         |
| Russia  | European Russia | Lower section of the Volga River (from Zhigulevsk city to the delta)                                                | N/A          | N/A           | <i>Acipenser stellatus</i> Pallas, 1771 (Acipenseridae)  | N/A        | N/A        | Ivanov [6]                 |
| Russia  | European Russia | Lower section of the Volga River (from Zhigulevsk city to the delta)                                                | N/A          | N/A           | <i>Acipenser sturio</i> Linnaeus, 1758 (Acipenseridae)   | N/A        | N/A        | Ivanov [6]                 |
| Russia  | European Russia | Lower section of the Volga                                                                                          | N/A          | N/A           | <i>Huso huso</i> (Linnaeus, 1758)                        | N/A        | N/A        | Ivanov [6]                 |

| Country | Region          | Locality                                                                                                                      | Latitude (N) | Longitude (E) | Hosts                                                                     | Feeding    | N, leeches | References                                                  |
|---------|-----------------|-------------------------------------------------------------------------------------------------------------------------------|--------------|---------------|---------------------------------------------------------------------------|------------|------------|-------------------------------------------------------------|
|         |                 | River (from Zhigulevsk city to the delta)                                                                                     |              |               | (Acipenseridae)                                                           |            |            |                                                             |
| Russia  | European Russia | Volgograd Reservoir on Volga River                                                                                            | 49.13        | 44.94         | <i>Abramis brama</i> (Linnaeus, 1758) (Cyprinidae)                        | N/A        | 1          | Lapkina et al. [5]                                          |
| Russia  | European Russia | Volga River below the Volgograd Reservoir (exact locality is not given; approx. coordinates), 1956-1964, A. Reshetnikova leg. | 48.48        | 44.86         | <i>Esox lucius</i> Linnaeus, 1758 (Esocidae)                              | N/A        | 1          | Reshetnikova [7]                                            |
| Russia  | European Russia | Volga River below the Volgograd Reservoir (exact locality is not given; approx. coordinates), 1956-1964, A. Reshetnikova leg. | 48.48        | 44.86         | <i>Huso huso</i> (Linnaeus, 1758) (Acipenseridae)                         | Successful | >22        | Reshetnikova [7]                                            |
| Russia  | European Russia | Volga River below the Volgograd Reservoir (exact locality is not given; approx. coordinates), 1956-1964, A. Reshetnikova leg. | 48.48        | 44.86         | <i>Acipenser gueldenstaedtii</i> Brandt & Ratzeburg, 1833 (Acipenseridae) | Successful | >11        | Reshetnikova [7]                                            |
| Russia  | European Russia | Volga River near Volgograd city                                                                                               | 48.70        | 44.52         | N/A                                                                       | N/A        | N/A        | Dontzov [8]                                                 |
| Russia  | European Russia | Volga River delta (exact locality is not given; approx. coordinates)                                                          | 46.39        | 48.03         | N/A                                                                       | N/A        | N/A        | Dontzov [8]                                                 |
| Russia  | Ural Mountains  | Chusovaya River, Volga River basin (exact locality is not given; approx. coordinates)                                         | 58.21        | 57.09         | N/A                                                                       | N/A        | N/A        | Epshtein [9]                                                |
| Russia  | Eastern Siberia | Selenga River, Lake Baikal Basin, 30 October 2013, E. Dzyuba leg. (exact locality is not given; approx. coordinates)          | 52.13        | 106.60        | <i>Coregonus migratorius</i> (Georgi, 1775) (Salmonidae)                  | N/A        | N/A        | NCBI's GenBank [acc. No. KR608789]; Kaygorodova et al. [10] |

| Country | Region          | Locality                                                                                                      | Latitude (N) | Longitude (E) | Hosts                                                | Feeding    | N, leeches | References                                    |
|---------|-----------------|---------------------------------------------------------------------------------------------------------------|--------------|---------------|------------------------------------------------------|------------|------------|-----------------------------------------------|
| Russia  | Eastern Siberia | Shallow waters of Lake Baikal near the Selenga River delta (exact locality is not given; approx. coordinates) | 52.30        | 106.29        | <i>Acipenser baerii</i> Brandt, 1869 (Acipenseridae) | Successful | 1          | Zaika [11]; Pugachev [12]                     |
| Russia  | Eastern Siberia | Selenga River, Lake Baikal Basin (exact locality is not given; approx. coordinates)                           | 52.13        | 106.60        | <i>Acipenser baerii</i> Brandt, 1869 (Acipenseridae) | Successful | 1          | Zaika [11]; Pugachev [12]                     |
| Russia  | Eastern Siberia | Angara River, Yenisey River basin (exact locality is not given; approx. coordinates)                          | 51.96        | 104.70        | N/A                                                  | N/A        | N/A        | Epshtein [9; 13]                              |
| Poland  | Baltic Coast    | Grabowa River at Jeżyczki village near Darłowo                                                                | 54.3442      | 16.3947       | <i>Salmo trutta</i> Linnaeus, 1758 (Salmonidae)      | Successful | N/A        | Nesemann & Neubert [14]; Bielecki et al. [15] |

N/A – not available.

## Supplementary References

1. Zykoff, V.P. Materials to the fauna of Volga and the hydrofauna of Saratov Province [In Russian]. *Bulletin de la Société impériale des naturalistes de Moscou* **1904**, 1903, 1–148.
2. Plotnikov, V. Leeches from the vicinities of the city of Saratov [In Russian]. *Works of the Volga Biological Station* **1909**, 3, 11–17.
3. Stschegolew, G.G. Leeches of River Oka [In Russian]. *Works of the Oka Biological Station in the city of Murom* **1922**, 2, 20–28.
4. Bogdanova, A.E.; Nikolskaya, N.P. Parasite fauna of Volga River before the regulation [In Russian]. *Proceedings of the State Scientific-Research Institute on Lake and River Fisheries* **1965**, 60, 5–110.
5. Lapkina, L.N.; Zharikova, T.I.; Svirskiĭ, A.M. Invasion of fish with leeches (Fam. Piscicolidae) in reservoirs of the Volga River [In Russian]. *Parazitologiya* **2002**, 36, 132–139.
6. Ivanov, V.P. Parasitofauna of sturgeons of Volgo-Caspian Basin [In Russian]. In *Parasitic animals of Volgograd Oblast: Proceedings of Department of Zoology*; Markov, G.S., Ed.; Volgograd Pedagogical Institute: Volgograd, USSR, **1969**; pp. 306–314.
7. Reshetnikova, A.V. Parasites of fishes of the downstream of the Volga HPS named after the XXII congress of CPSU [In Russian]. *Proceedings of the Volgograd Department of the State Scientific-Research Institute on Lake and River Fisheries* **1967**, 3, 299–320.
8. Dontzov, Y.S. Influence of regulation of the Volga River runoff on the helminth fauna of fish from the reservoirs of the Volga cascade [In Russian]. In *Fauna, Systematics, Biology and Ecology of Helminths and Their Intermediate Hosts*; Shaldybin, L.S., Ed.; Gorky State Pedagogical Institute: Gorky, USSR, **1979**, pp. 13–40.
9. Epshtein, V.M. Type Annelida. Class Hirudinea [In Russian]. In *Guide to Parasites of Freshwater Fishes of the Fauna of the USSR*; Bauer, O. N., Ed.; Zoological Institute of the USSR Academy of Sciences: Leningrad, USSR, **1987**; Volume 3, pp. 340–372.
10. Kaygorodova, I.; Matveenkov, E.; Dzyuba, E. Unexpected discovery of an ectoparasitic invasion first detected in the Baikal coregonid fish population. *Fishes* **2022**, 7, 298. <https://doi.org/10.3390/fishes7050298>
11. Zaika, V.E. *Fish parasitofauna of Lake Baikal* [In Russian]. Nauka Publishing House: Moscow, USSR, **1965**; pp. 1–107.

12. Pugachev, O.N. Checklist of the Freshwater Fish Parasites of the Northern Asia. Nematoda, Acanthocephala, Hirudinea, Mollusca, Crustacea, Acari [In Russian]. *Proceedings of the Zoological Institute of the Russian Academy of Sciences* **2004**, 304, 1–250.
13. Epshtein, V.M. A revision of the genera *Piscicola* and *Cystobranthus* (Hirudinea, Piscicolidae) [In Russian]. In *The Problems of Parasitology. Proceedings of the 6th scientific conference of parasitologists of the Ukrainian SSR*. Naukova Dumka Publishing House: Kiev, USSR, 1969; Volume 2, pp. 286–287.
14. Neesemann, H.; Neubert, E. *Süßwasserfauna von Mitteleuropa, Bd. 6/2, Annelida: Clitellata: Branchiobdellida, Acanthobdellida, Hirudinea*; Spektrum Akademischer Verlag: Heidelberg, Berlin, Germany, 1999; pp. 1–178.
15. Bielecki, A.; Kapusta, A.; Cichocka, J.M. Atlantic sturgeon, *Acipenser oxyrinchus* Mitchill, infected by the parasitic leech, *Caspiobdella fadejewi* (Epshtein) (Hirudinea; Piscicolidae), in the Drwęca River. *Fisheries & Aquatic Life* **2011**, 19, 87–93. <https://doi.org/10.2478/v10086-011-0010-y>
