# Supplementary material
Source: MDPI journal article supplement (https://www.mdpi.com/2073-4441/14/24/4010)
Supplement: s1 [file s1]

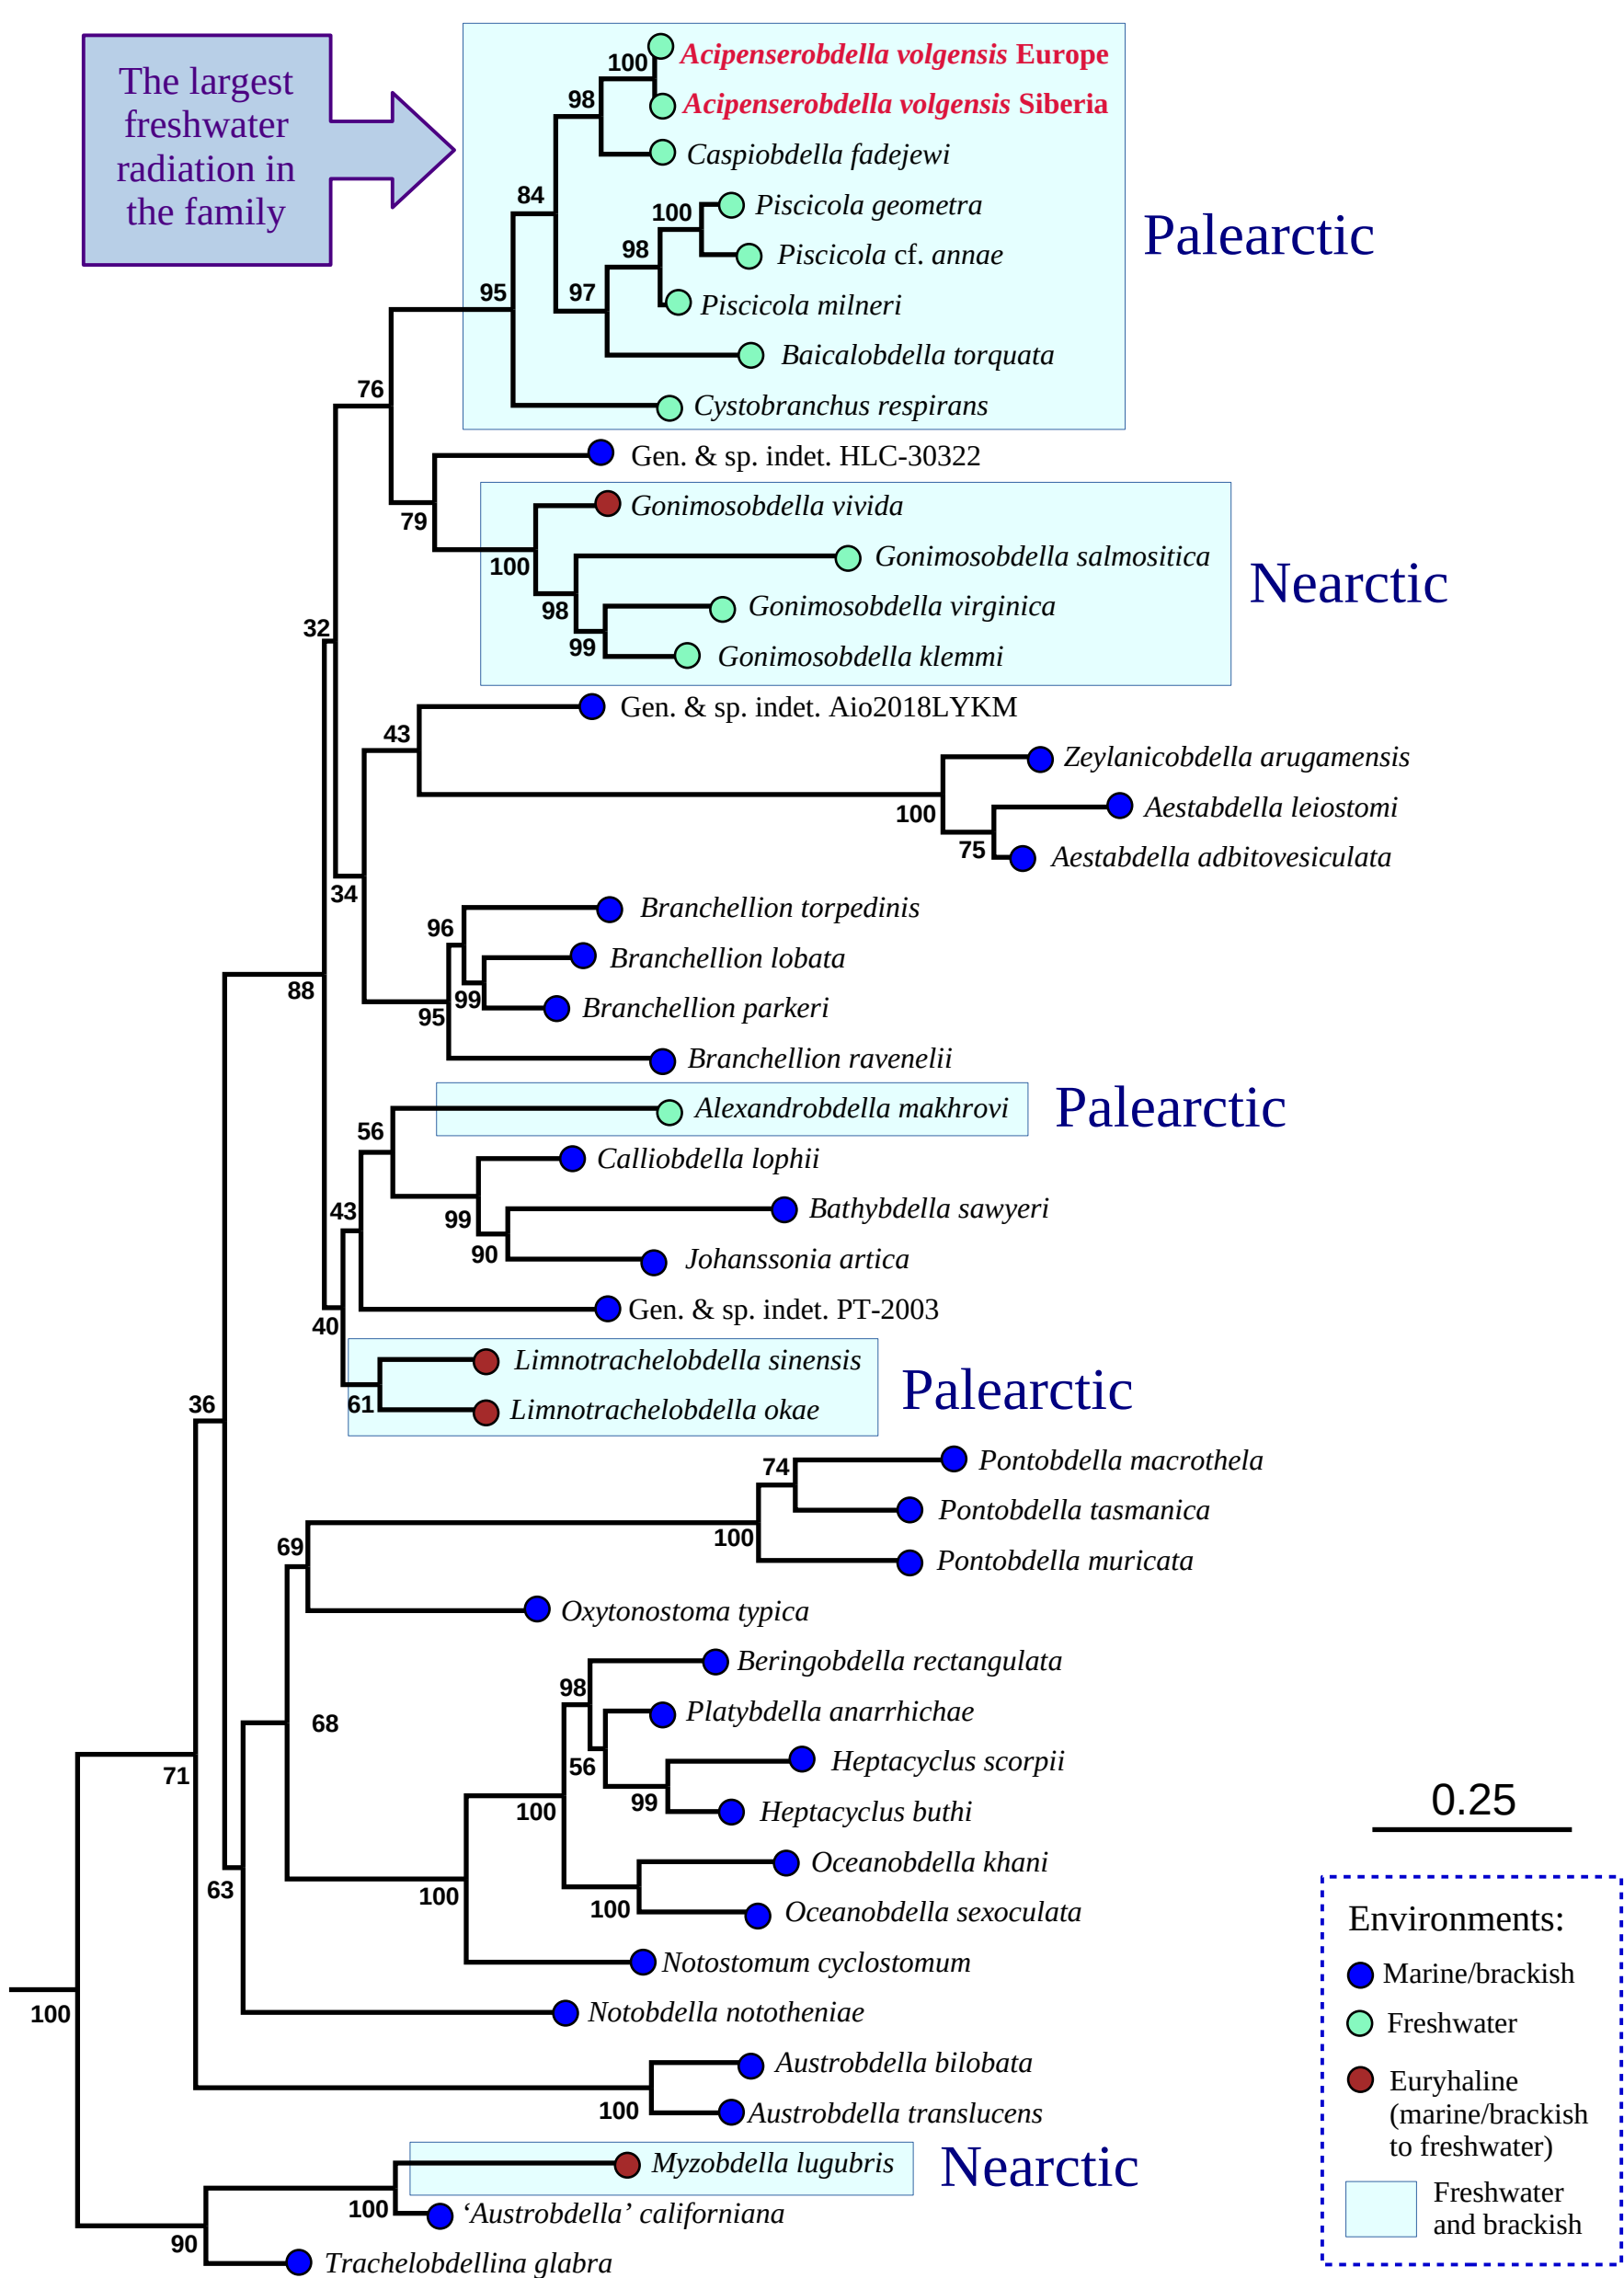

**Figure S1.** Maximum likelihood phylogeny (three codons of COI + 18S rRNA) of the Piscicolidae. The tip color circles indicate environmental preference of each species. The black numbers near nodes are bootstrap support (BS) values of IQ-TREE v. 1.6.12. Two Ozobranchidae taxa were used as outgroup (not shown). The scale bar indicates the branch lengths (substitutions per site).
