# Supplementary material
Source: MDPI journal article supplement (https://www.mdpi.com/2073-4441/14/24/4010)
Supplement: s1 [file s1]

**Table S1.** List of *COI* and *18S rRNA* gene sequences of the Hirudinea used in this study

| Taxa                                                       | COI      | 18S rRNA | Haplotype Code | Locality                                                                                                            | Environment* | Reference               |
|------------------------------------------------------------|----------|----------|----------------|---------------------------------------------------------------------------------------------------------------------|--------------|-------------------------|
| <b>In-group taxa (Piscicolidae)</b>                        |          |          |                |                                                                                                                     |              |                         |
| <b><i>Acipenserobdella</i> Epshtein, 1969</b>              |          |          |                |                                                                                                                     |              |                         |
| <i>A. volgensis</i> (Zykoff, 1904)                         | OP377067 | OP377087 | AciVol_E       | Russia: Moscow River, Volga Basin; free-living                                                                      | Freshwater   | This study              |
| <i>A. volgensis</i> (Zykoff, 1904)                         | KR608789 | N/A      | AciVol_S1      | Russia: Selenga River, Baikal Basin, Eastern Siberia; from <i>Coregonus migratorius</i> (Georgi, 1775) (Salmonidae) | Freshwater   | Kaygorodova et al. [1]  |
| <b><i>Aestabdella</i> Burreson, 1976</b>                   |          |          |                |                                                                                                                     |              |                         |
| <i>A. adbitovesiculata</i> (Moore, 1952)                   | DQ414300 | DQ414254 | AesAbd         | USA: Hawaii                                                                                                         | Marine       | Williams & Burreson [2] |
| <i>A. leiostomi</i> Burreson, 1991                         | DQ414305 | DQ414259 | AesLei         | USA: Virginia                                                                                                       | Marine       | Williams & Burreson [2] |
| <b><i>Alexandrobdeella</i> Bolotov et al., 2020</b>        |          |          |                |                                                                                                                     |              |                         |
| <i>A. makhrovi</i> Bolotov et al., 2020                    | MN295413 | MN312187 | AleMak         | Russia: Lake Khanka, Prymorie Region, Russian Far East                                                              | Freshwater   | Bolotov et al. [3]      |
| <b><i>Austrobdeella</i> Badham, 1916</b>                   |          |          |                |                                                                                                                     |              |                         |
| <i>A. bilobata</i> Ingram, 1957                            | DQ414301 | DQ414255 | AusBil         | Australia: Tasmania                                                                                                 | Marine       | Williams & Burreson [2] |
| <i>'A.' californiana</i> Burreson, 1977                    | DQ414304 | DQ414258 | AusCal         | USA: California                                                                                                     | Marine       | Williams & Burreson [2] |
| <i>A. translucens</i> Badham, 1916                         | DQ414306 | DQ414260 | AusTra         | Australia: South Australia                                                                                          | Marine       | Williams & Burreson [2] |
| <b><i>Baicalobdeella</i> Dogiel &amp; Bogolepova, 1957</b> |          |          |                |                                                                                                                     |              |                         |
| <i>B. torquata</i> Grube, 1871                             | AY336018 | N/A      | BaiTor         | Russia: Lake Baikal                                                                                                 | Freshwater   | Utevsky & Trontelj [4]  |
| <b><i>Bathybdella</i> Burreson, 1981</b>                   |          |          |                |                                                                                                                     |              |                         |
| <i>B. sawyeri</i> Burreson, 1981                           | DQ414311 | DQ414265 | BatSaw         | Pacific Ocean: East Pacific Rise                                                                                    | Marine       | Williams & Burreson [2] |
| <b><i>Beringobdeella</i> Caballero, 1974</b>               |          |          |                |                                                                                                                     |              |                         |
| <i>B. rectangulata</i> (Levinsen, 1881)                    | DQ414310 | DQ414264 | BerRec         | Pacific Ocean: Bering Sea                                                                                           | Marine       | Williams & Burreson [2] |
| <b><i>Branchellion</i> Savigny, 1822</b>                   |          |          |                |                                                                                                                     |              |                         |
| <i>B. lobata</i> Moore, 1952                               | DQ414307 | DQ414261 | BraLob         | USA: California                                                                                                     | Marine       | Williams & Burreson [2] |
| <i>B. parkeri</i> Richardson, 1949                         | DQ414308 | DQ414262 | BraPar         | Australia: Tasmania                                                                                                 | Marine       | Williams & Burreson [2] |
| <i>B. ravenelii</i> (Girard, 1851)                         | DQ414309 | DQ414263 | BraRav         | USA: Gulf of Mexico                                                                                                 | Marine       | Williams & Burreson [2] |
| <i>B. torpedinis</i> Savigny, 1822                         | AF003265 | AF115993 | BraTor         | USA: Virginia                                                                                                       | Marine       | Siddall & Burreson [5]  |
| <b><i>Calliobdeella</i> van Beneden &amp; Hesse, 1863</b>  |          |          |                |                                                                                                                     |              |                         |
| <i>C. lophii</i> Van Beneden & Hesse, 1863                 | DQ414314 | DQ414268 | CalLop         | Norway                                                                                                              | Marine       | Williams & Burreson [2] |
| <b><i>Caspiobdeella</i> Epshtein, 1966</b>                 |          |          |                |                                                                                                                     |              |                         |
| <i>C. fadejewi</i> (Epshtein,                              | AY336020 | N/A      | CasFad         | Ukraine: Kharkiv                                                                                                    | Freshwater   | Utevsky &               |

| Taxa                                                       | COI      | 18S rRNA | Haplotype Code | Locality                                                          | Environment*           | Reference               |
|------------------------------------------------------------|----------|----------|----------------|-------------------------------------------------------------------|------------------------|-------------------------|
| 1961)                                                      |          |          |                | Region, Pechenegi Reservoir                                       |                        | Trontelj [4]            |
| <b><i>Cystobranchnus</i> Diesing, 1859</b>                 |          |          |                |                                                                   |                        |                         |
| <i>C. respirans</i> (Troschel, 1850)                       | AY336021 | N/A      | CysRes         | Slovenia: Sava River near Ljubljana                               | Freshwater             | Utevsky & Trontelj [4]  |
| <b><i>Gonimosobdella</i> Williams &amp; Burreson, 2005</b> |          |          |                |                                                                   |                        |                         |
| <i>G. klemmi</i> Williams & Burreson, 2005                 | DQ414318 | DQ414272 | GonKle         | USA: Arkansas                                                     | Freshwater             | Williams & Burreson [2] |
| <i>G. salmositica</i> (Meyer, 1946)                        | DQ414316 | DQ414270 | CysSal         | Canada: British Columbia                                          | Freshwater             | Williams & Burreson [2] |
| <i>G. virginica</i> (Hoffman, 1964)                        | DQ414317 | DQ414271 | CysVir         | USA: North Carolina                                               | Freshwater             | Williams & Burreson [2] |
| <i>G. vivida</i> (Verrill, 1872)                           | AF003260 | AF115992 | CalViv         | USA: Virginia                                                     | Brackish to freshwater | Siddall & Burreson [5]  |
| <b><i>Heptacyclus</i> Vasilejev, 1939</b>                  |          |          |                |                                                                   |                        |                         |
| <i>H. buthi</i> (Burreson & Kalman, 2006)                  | DQ414322 | DQ414276 | MalBut         | USA: California                                                   | Marine                 | Williams & Burreson [2] |
| <i>H. scorpii</i> (Malm, 1863)                             | DQ414326 | DQ414280 | MalSco         | Canada: New Brunswick                                             | Marine                 | Williams & Burreson [2] |
| <b><i>Johanssonia</i> Selensky, 1914</b>                   |          |          |                |                                                                   |                        |                         |
| <i>J. artica</i> (Johansson, 1898)                         | DQ414320 | DQ414274 | JohArc         | Canada: Newfoundland                                              | Marine                 | Williams & Burreson [2] |
| <b><i>Limnotrachelobdella</i> Epshtein, 1968</b>           |          |          |                |                                                                   |                        |                         |
| <i>L. okae</i> (Moore, 1924)                               | AY336022 | N/A      | LimOka         | Russia: Nevelskoy Strait between the Sakhalin Island and mainland | Marine to freshwater   | Utevsky & Trontelj [4]  |
| <i>L. sinensis</i> (Blanchard, 1896)                       | LC275140 | LC275139 | LimSin         | Japan: Shiga                                                      | Brackish to freshwater | NCBI's Genbank          |
| <b><i>Myzobdella</i> Leidy, 1851</b>                       |          |          |                |                                                                   |                        |                         |
| <i>M. lugubris</i> Leidy, 1851                             | AF003269 | AF115994 | MyzLug         | USA: Virginia                                                     | Marine to freshwater   | Siddall & Burreson [5]  |
| <b><i>Notostomum</i> Levinsen, 1882</b>                    |          |          |                |                                                                   |                        |                         |
| <i>N. cyclostomum</i> Johansson, 1898                      | DQ414327 | DQ414282 | NotCyc         | Pacific Ocean: Bering Sea                                         | Marine                 | Williams & Burreson [2] |
| <b><i>Notobdella</i> Benham, 1909</b>                      |          |          |                |                                                                   |                        |                         |
| <i>N. nototheniae</i> Benham, 1909                         | DQ414330 | DQ414285 | NotNot         | Antarctica: South Sandwich Island                                 | Marine                 | Williams & Burreson [2] |
| <b><i>Oceanobdella</i> Caballero, 1956</b>                 |          |          |                |                                                                   |                        |                         |
| <i>O. khani</i> Burreson & Williams, 2004                  | DQ414331 | DQ414286 | OceKha         | Pacific Ocean: Bering Sea                                         | Marine                 | Williams & Burreson [2] |
| <i>O. sexoculata</i> (Malm, 1863)                          | DQ414332 | DQ414287 | OceSex         | Canada: New Brunswick                                             | Marine                 | Williams & Burreson [2] |
| <b><i>Oxytonostoma</i> Malm, 1863</b>                      |          |          |                |                                                                   |                        |                         |
| <i>O. typica</i> Malm, 1863                                | DQ414333 | DQ414288 | OxyTyp         | Canada: New Brunswick                                             | Marine                 | Williams & Burreson [2] |
| <b><i>Piscicola</i> Blainville, 1818</b>                   |          |          |                |                                                                   |                        |                         |
| <i>P. cf. annae</i> Bielecki, 1997                         | AY336016 | N/A      | PisAnn         | Germany: Ehingen                                                  | Freshwater             | Utevsky & Trontelj [4]  |
| <i>P. geometra</i> (Linnaeus, 1761)                        | AY336014 | AF099946 | PisGeo         | Germany: Neckar-Altarm, Pleidelsheim                              | Freshwater             | Utevsky & Trontelj [4]  |
| <i>P. milneri</i> (Verrill, 1874)                          | DQ414337 | DQ414292 | PisMil         | Canada: Quebec                                                    | Freshwater             | Williams &              |

| Taxa                                        | COI      | 18S rRNA | Haplotype Code | Locality                                         | Environment*       | Reference               |
|---------------------------------------------|----------|----------|----------------|--------------------------------------------------|--------------------|-------------------------|
|                                             |          |          |                |                                                  |                    | Burreson [2]            |
| <b><i>Platybdella</i> Malm, 1863</b>        |          |          |                |                                                  |                    |                         |
| <i>P. anarrhichae</i> (Diesing, 1859)       | DQ414336 | DQ414291 | PlaAna         | Norway                                           | Marine             | Williams & Burreson [2] |
| <b><i>Pontobdella</i> Leach, 1815</b>       |          |          |                |                                                  |                    |                         |
| <i>P. macrothela</i> (Schmarda, 1861)       | AF116022 | AF115996 | StiMac         | USA: Virginia                                    | Marine             | Apakupakul et al. [6]   |
| <i>P. muricata</i> (Linnaeus, 1758)         | KY659072 | KY659070 | PonMur         | Italy: Mediterranean Sea                         | Marine             | Bottari et al. [7]      |
| <i>P. tasmanica</i> (Hickman, 1942)         | DQ414343 | DQ414298 | StiTas         | Australia: Tasmania                              | Marine             | Williams & Burreson [2] |
| <b><i>Trachelobdellina</i> Moore, 1957</b>  |          |          |                |                                                  |                    |                         |
| <i>T. glabra</i> Moore, 1957                | EF405597 | N/A      | TraGla         | Antarctica: Argentine Islands, Vernadsky Station | Marine             | Utevsky et al. [8]      |
| <b><i>Zeylanicobdella</i> Silva, 1963</b>   |          |          |                |                                                  |                    |                         |
| <i>Z. arugamensis</i> de Silva, 1963        | DQ414344 | DQ414299 | ZeyAru         | Indian Ocean: Borneo                             | Marine             | Williams & Burreson [2] |
| <b>Genus indet.</b>                         |          |          |                |                                                  |                    |                         |
| Gen. & sp. indet. PT-2003                   | AY336023 | N/A      | PisSp2         | Russia: Tunaycha Lake on Sakhalin Island         | Brackish to marine | Utevsky & Trontelj [4]  |
| Gen. & sp. indet. HLC-30322                 | MG421319 | N/A      | PisSp1         | Canada: Nunavut, Somerset Island, Creswell Bay   | Marine             | NCBI's Genbank          |
| Gen. & sp. indet. Aio2018LYKM               | LC460256 | N/A      | PisSp3         | Japan: Yamaguchi, Aio                            | Marine             | NCBI's Genbank          |
| <b>Outgroup taxa (Ozobranchidae)</b>        |          |          |                |                                                  |                    |                         |
| <b><i>Ozobranchus</i> Quatrefages, 1852</b> |          |          |                |                                                  |                    |                         |
| <i>O. branchiatus</i> (Menzies, 1791)       | KF728213 | KF728214 | OzoBra         | Hong Kong                                        | Marine             | Truong [9]              |
| <i>O. margoi</i> (Apáthy, 1890)             | KJ451407 | KF728217 | OzoMar         | Taiwan: I-Lan                                    | Marine             | Tseng et al. [10]       |

N/A – not available. \*Data on environmental preferences was obtained from the IRMNG database (<https://www.irmng.org>; [11]) and published sources [3; 12–15].

## Supplementary References

1. Kaygorodova, I.; Matveenko, E.; Dzyuba, E. Unexpected discovery of an ectoparasitic invasion first detected in the Baikal coregonid fish population. *Fishes* **2022**, *7*, 298. <https://doi.org/10.3390/fishes7050298>
2. Williams, J.I.; Burreson, E.M. Phylogeny of the fish leeches (Oligochaeta, Hirudinida, Piscicolidae) based on nuclear and mitochondrial genes and morphology. *Zoologica Scripta* **2006**, *35*, 627–639. <https://doi.org/10.1111/j.1463-6409.2006.00246.x>
3. Bolotov, I.N.; Klass, A.L.; Konopleva, E.S.; Bepalaya, Y.V.; Gofarov, M.Y.; Kondakov, A.V.; Vikhrev, I.V. First freshwater mussel-associated piscicolid leech from East Asia. *Scientific Reports* **2020**, *10*, 19854. <https://doi.org/10.1038/s41598-020-76854-0>
4. Utevsky, S.Y.; Trontelj, P. Phylogenetic relationships of fish leeches (Hirudinea, Piscicolidae) based on mitochondrial DNA sequences and morphological data. *Zoologica Scripta* **2004**, *33*, 375–385. <https://doi.org/10.1111/j.0300-3256.2004.00156.x>
5. Siddall, M.E.; Burreson, E.M. Phylogeny of leeches (Hirudinea) based on mitochondrial cytochrome c oxidase subunit I. *Molecular Phylogenetics and Evolution* **1998**, *9*, 156–162. <https://doi.org/10.1006/mpev.1997.0455>

6. Apakupakul, K.; Siddall, M.E.; Bureson, E.M. Higher level relationships of leeches (Annelida: Clitellata: Euhirudinea) based on morphology and gene sequences. *Molecular Phylogenetics and Evolution* **1999**, *12*, 350–359. <https://doi.org/10.1006/mpev.1999.0639>
7. Bottari, T.; Profeta, A.; Rinelli, P.; Gaglio, G.; La Spada, G.; Smedile, F.; Giordano, D. On the presence of *Pontobdella muricata* (Hirudinea: Piscicolidae) on some elasmobranchs of the Tyrrhenian Sea (Central Mediterranean). *Acta Adriatica: International Journal of Marine Sciences* **2017**, *58*, 225–233. <https://doi.org/10.32582/aa.58.2.3>
8. Utevsky, S.Y.; Utevsky, A.Y.; Schiaparelli, S.; Trontelj, P. Molecular phylogeny of pontobdelline leeches and their place in the descent of fish leeches (Hirudinea, Piscicolidae). *Zoologica Scripta* **2007**, *36*, 271–280. <https://doi.org/10.1111/j.1463-6409.2007.00279.x>
9. Truong, T.M. Investigating DNA barcoding potentials and genetic structure in *Ozobranchus* spp. from Atlantic and Pacific Ocean sea turtles. Master of Science (MS) Thesis, Wright State University, Dayton, Ohio, USA, 2014. [http://rave.ohiolink.edu/etdc/view?acc\\_num=wright1392769367](http://rave.ohiolink.edu/etdc/view?acc_num=wright1392769367)
10. Tseng, C.; Leu, J.; Cheng, I. On the genetic diversity of two species of the genus *Ozobranchus* (Hirudinida; Ozobranchidae) from the Atlantic and Pacific oceans. *Journal of the Marine Biological Association of the United Kingdom* **2018**, *98*, 955–960. <https://doi.org/10.1017/S0025315416001958>
11. Rees, T.; Vandepitte, L.; Decock, W.; Vanhoorne, B. IRMNG 2006–2016: 10 years of a global Taxonomic Database. *Biodiversity Informatics* **2017**, *12*, <https://doi.org/10.17161/bi.v12i0.6522>
12. Lukin, E.I. Leeches of fresh and brackish water bodies [In Russian]. *Fauna of the USSR* **1976**, *109*, 1–484.
13. Smith, D.G.; Taubert, B.D. New records of leeches (Annelida: Hirudinea) from the shortnose sturgeon (*Acipenser brevirostrum*) in the Connecticut River. *Proceedings of the Helminthological Society of Washington* **1980**, *47*, 147–148.
14. Appy, R.G.; Dadswell, M.J. Marine and estuarine piscicolid leeches (Hirudinea) of the Bay of Fundy and adjacent waters with a key to species. *Canadian Journal of Zoology* **1981**, *59*, 183–192. <https://doi.org/10.1139/z81-032>
15. Epshtein, V.M. Type Annelida. Class Hirudinea [In Russian]. In *Guide to Parasites of Freshwater Fishes of the Fauna of the USSR*; Bauer, O. N., Ed.; Zoological Institute of the USSR Academy of Sciences: Leningrad, USSR, **1987**; Volume 3, pp. 340–372.
